# Supplementary material for: CD244 represents a new therapeutic target in head and neck squamous cell carcinoma
Source: PubMed Central journal article supplement — J Immunother Cancer. 2020 Mar 26;8(1):e000245. doi: 10.1136/jitc-2019-000245 (PMC7174077; doi:10.1136/jitc-2019-000245), 2020-03-26
Supplement: jitc-2019-000245supp001.pdf [file jitc-2019-000245supp001.pdf]

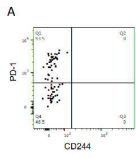

**Supplemental Figure 1.** (A) Tumors from CD244<sup>-/-</sup> mice were analyzed by flow cytometry in parallel with those from WT mice. The delineation between CD244<sup>+</sup> and CD244<sup>-</sup> CD8<sup>+</sup> T cells in tumors from WT mice was determined by using the analogous CD244<sup>-/-</sup> CD8<sup>+</sup> T cell flow chart.

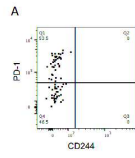

**Supplemental Figure 1.** (A) Tumors from CD244<sup>-/-</sup> mice were analyzed by flow cytometry in parallel with those from WT mice. The delineation between CD244<sup>+</sup> and CD244<sup>-</sup> CD8<sup>+</sup> T cells in tumors from WT mice was determined by using the analogous CD244<sup>-/-</sup> CD8<sup>+</sup> T cell flow chart.

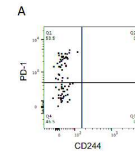

**Supplemental Figure 1.** (A) Tumors from CD244<sup>-/-</sup> mice were analyzed by flow cytometry in parallel with those from WT mice. The delineation between CD244<sup>+</sup> and CD244<sup>-</sup> CD8<sup>+</sup> T cells in tumors from WT mice was determined by using the analogous CD244<sup>-/-</sup> CD8<sup>+</sup> T cell flow chart.
