# Supplementary material for: CD244 represents a new therapeutic target in head and neck squamous cell carcinoma
Source: PubMed Central journal article supplement — J Immunother Cancer. 2020 Mar 26;8(1):e000245. doi: 10.1136/jitc-2019-000245 (PMC7174077; doi:10.1136/jitc-2019-000245), 2020-03-26
Supplement: jitc-2019-000245supp002.pdf [file jitc-2019-000245supp002.pdf]

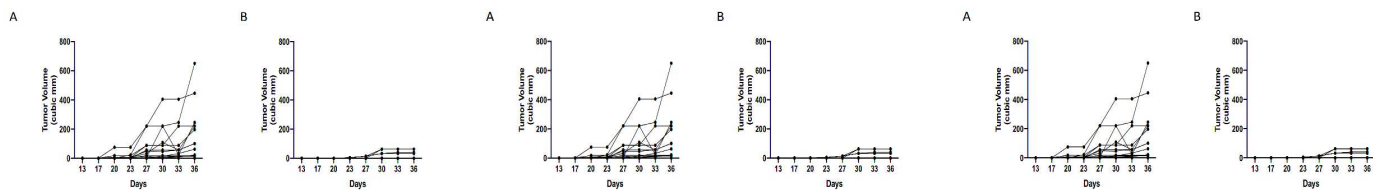

**Supplementary Figure 2. (A)** WT male mice ( $n = 7$ ) received  $2 \times 10^6$  MEER cells s.c. in each flank. Tumors were measured twice weekly until maximum allowable size was reached. The experiment was repeated three times with consistent results. Of 14 tumor cell injections, 13 tumors grew to measurable size. Fewer than 13 distinct lines are visualized on the graph as some of the tumors grew uniformly (overlying lines). **(B)** CD244<sup>-/-</sup> male mice ( $n=6$ ) received  $2 \times 10^6$  MEER cells s.c. in each flank. Tumors were measured twice weekly until maximum allowable size was reached. The experiment was repeated three times with consistent results. Of 12 tumor cell injections, 6 tumors grew to measurable size, consistent with repeatedly observed poor tumor growth in CD244<sup>-/-</sup> mice. Fewer than 6 distinct lines are visualized on the graph as some of the tumors grew uniformly (overlying lines).

**Supplementary Figure 2. (A)** WT male mice ( $n = 7$ ) received  $2 \times 10^6$  MEER cells s.c. in each flank. Tumors were measured twice weekly until maximum allowable size was reached. The experiment was repeated three times with consistent results. Of 14 tumor cell injections, 13 tumors grew to measurable size. Fewer than 13 distinct lines are visualized on the graph as some of the tumors grew uniformly (overlying lines). **(B)** CD244<sup>-/-</sup> male mice ( $n=6$ ) received  $2 \times 10^6$  MEER cells s.c. in each flank. Tumors were measured twice weekly until maximum allowable size was reached. The experiment was repeated three times with consistent results. Of 12 tumor cell injections, 6 tumors grew to measurable size, consistent with repeatedly observed poor tumor growth in CD244<sup>-/-</sup> mice. Fewer than 6 distinct lines are visualized on the graph as some of the tumors grew uniformly (overlying lines).

**Supplementary Figure 2. (A)** WT male mice ( $n = 7$ ) received  $2 \times 10^6$  MEER cells s.c. in each flank. Tumors were measured twice weekly until maximum allowable size was reached. The experiment was repeated three times with consistent results. Of 14 tumor cell injections, 13 tumors grew to measurable size. Fewer than 13 distinct lines are visualized on the graph as some of the tumors grew uniformly (overlying lines). **(B)** CD244<sup>-/-</sup> male mice ( $n=6$ ) received  $2 \times 10^6$  MEER cells s.c. in each flank. Tumors were measured twice weekly until maximum allowable size was reached. The experiment was repeated three times with consistent results. Of 12 tumor cell injections, 6 tumors grew to measurable size, consistent with repeatedly observed poor tumor growth in CD244<sup>-/-</sup> mice. Fewer than 6 distinct lines are visualized on the graph as some of the tumors grew uniformly (overlying lines).
