# Supplementary material for: CD244 represents a new therapeutic target in head and neck squamous cell carcinoma
Source: PubMed Central journal article supplement — J Immunother Cancer. 2020 Mar 26;8(1):e000245. doi: 10.1136/jitc-2019-000245 (PMC7174077; doi:10.1136/jitc-2019-000245), 2020-03-26
Supplement: jitc-2019-000245supp003.pdf [file jitc-2019-000245supp003.pdf]

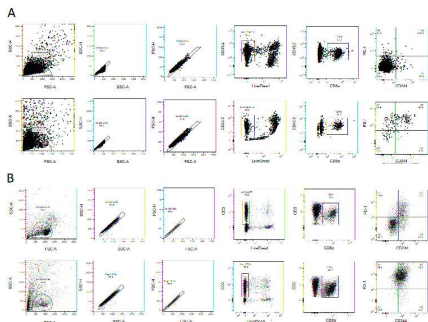

**Supplemental Figure 3. (A)** Gating strategy for mouse splenocytes is shown: cells were first gated by size and scatter on lymphocytes, then sequentially on SSC-H vs SSC-A and FSC-H vs FSC-A to define single cells. Live (viability dye negative) CD45<sup>+</sup> hematopoietic cells were gated from the single cells. CD8<sup>+</sup> cells were gated from live CD45<sup>+</sup> cells. **(B)** Human PBMCs were isolated by density centrifugation with Ficoll-Paque and stained for flow cytometry. Live cells were gated (negative viability dye) and a lymphocyte gate was determined by size and scatter. CD3<sup>+</sup> cells were gated from live lymphocytes, and CD8<sup>+</sup> cells were gated from live CD3<sup>+</sup> lymphocytes. The same gating was then applied to tumor cells stained in parallel with the control PBMCs.

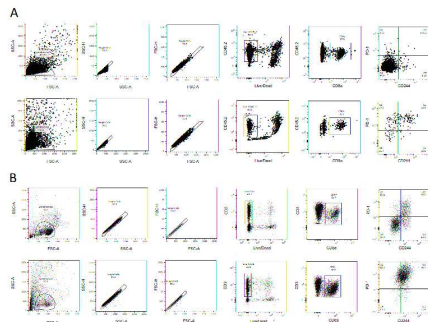

**Supplemental Figure 3. (A)** Gating strategy for mouse splenocytes is shown: cells were first gated by size and scatter on lymphocytes, then sequentially on SSC-H vs SSC-A and FSC-H vs FSC-A to define single cells. Live (viability dye negative) CD45<sup>+</sup> hematopoietic cells were gated from the single cells. CD8<sup>+</sup> cells were gated from live CD45<sup>+</sup> cells. **(B)** Human PBMCs were isolated by density centrifugation with Ficoll-Paque and stained for flow cytometry. Live cells were gated (negative viability dye) and a lymphocyte gate was determined by size and scatter. CD3<sup>+</sup> cells were gated from live lymphocytes, and CD8<sup>+</sup> cells were gated from live CD3<sup>+</sup> lymphocytes. The same gating was then applied to tumor cells stained in parallel with the control PBMCs.

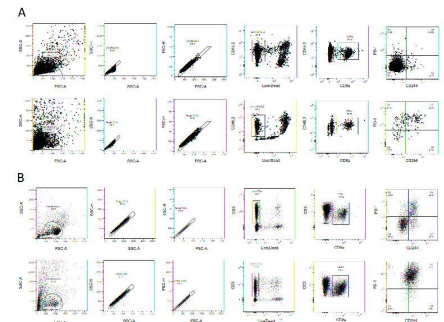

**Supplemental Figure 3. (A)** Gating strategy for mouse splenocytes is shown: cells were first gated by size and scatter on lymphocytes, then sequentially on SSC-H vs SSC-A and FSC-H vs FSC-A to define single cells. Live (viability dye negative) CD45<sup>+</sup> hematopoietic cells were gated from the single cells. CD8<sup>+</sup> cells were gated from live CD45<sup>+</sup> cells. **(B)** Human PBMCs were isolated by density centrifugation with Ficoll-Paque and stained for flow cytometry. Live cells were gated (negative viability dye) and a lymphocyte gate was determined by size and scatter. CD3<sup>+</sup> cells were gated from live lymphocytes, and CD8<sup>+</sup> cells were gated from live CD3<sup>+</sup> lymphocytes. The same gating was then applied to tumor cells stained in parallel with the control PBMCs.
