# Supplementary material for: CD244 represents a new therapeutic target in head and neck squamous cell carcinoma
Source: PubMed Central journal article supplement — J Immunother Cancer. 2020 Mar 26;8(1):e000245. doi: 10.1136/jitc-2019-000245 (PMC7174077; doi:10.1136/jitc-2019-000245), 2020-03-26
Supplement: jitc-2019-000245supp004.pdf [file jitc-2019-000245supp004.pdf]

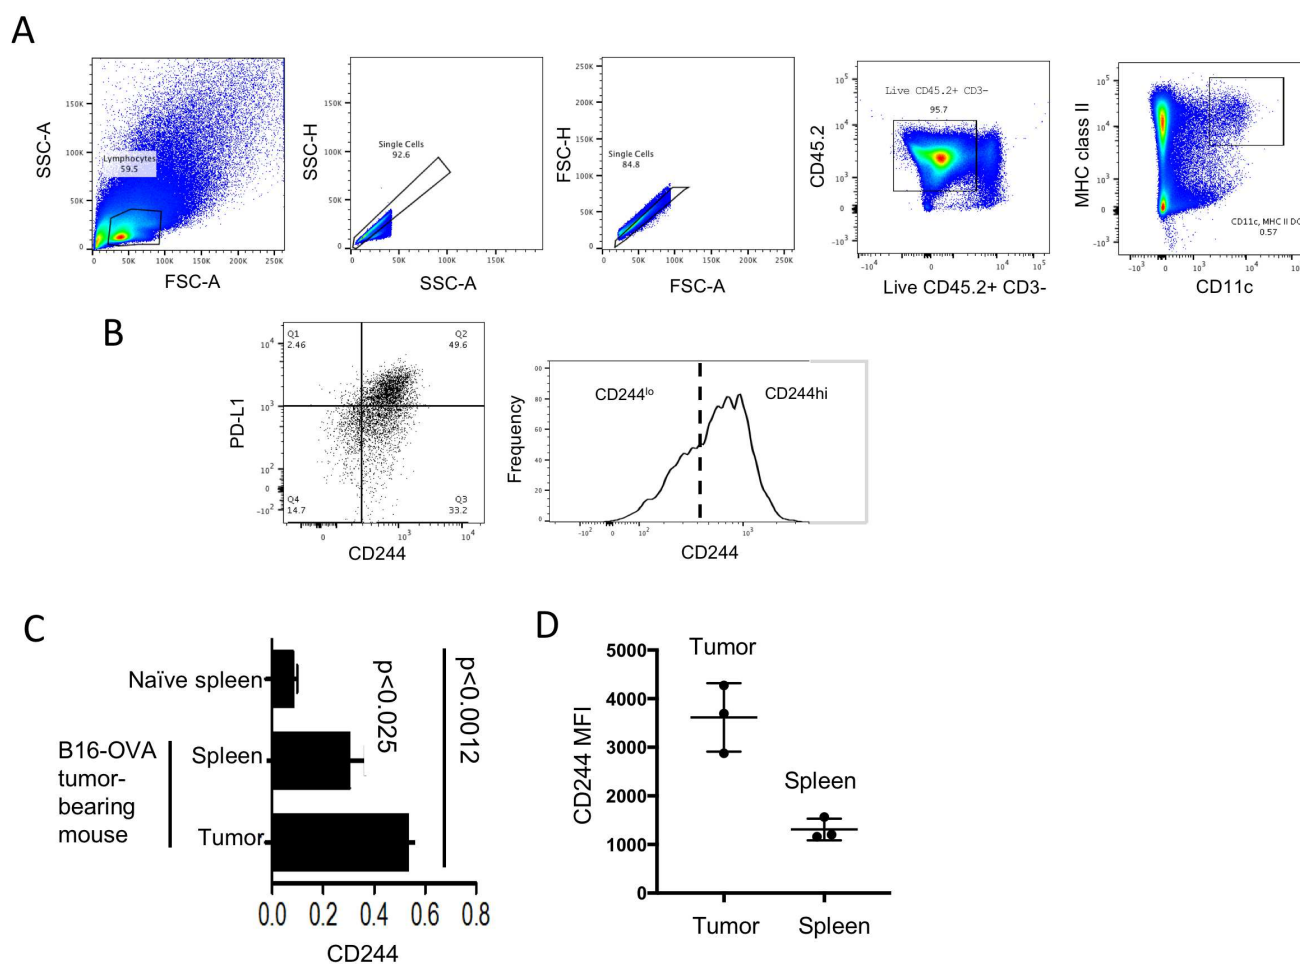

**Supplemental Figure 4.** (A) MEER tumor cells were injected subcutaneously into the flanks of WT mice. Spleens and tumors were harvested on Day 24 and analyzed by flow cytometry. Cells were first gated on lymphocytes, then sequentially on SSC-H vs SSC-A and FSC-H vs FSC-A to define single cells. Live (viability dye negative) CD45<sup>+</sup> hematopoietic cells were gated from the single cells. MHC class II<sup>+</sup> CD11c<sup>+</sup> DCs were gated from live CD45<sup>+</sup> cells. (B) A histogram of CD244 expression on splenic DCs was used to determine the cut point between DCs with low and high CD244 expression. (C) B16-OVA tumor cells were injected subcutaneously in WT mice (n=3). RT-PCR was used to measure CD244 mRNA levels from CD11c<sup>+</sup> DCs sorted from tumors, spleens from tumor-bearing mice, and naïve mouse spleens. CD244 mRNA levels are expressed as relative units using L32 as a control. (D) In parallel, DC from B16-OVA tumors and associated spleens were analyzed for CD244 expression by flow cytometry.
