# Supplementary material for: CD244 represents a new therapeutic target in head and neck squamous cell carcinoma
Source: PubMed Central journal article supplement — J Immunother Cancer. 2020 Mar 26;8(1):e000245. doi: 10.1136/jitc-2019-000245 (PMC7174077; doi:10.1136/jitc-2019-000245), 2020-03-26
Supplement: jitc-2019-000245supp006.pdf [file jitc-2019-000245supp006.pdf]

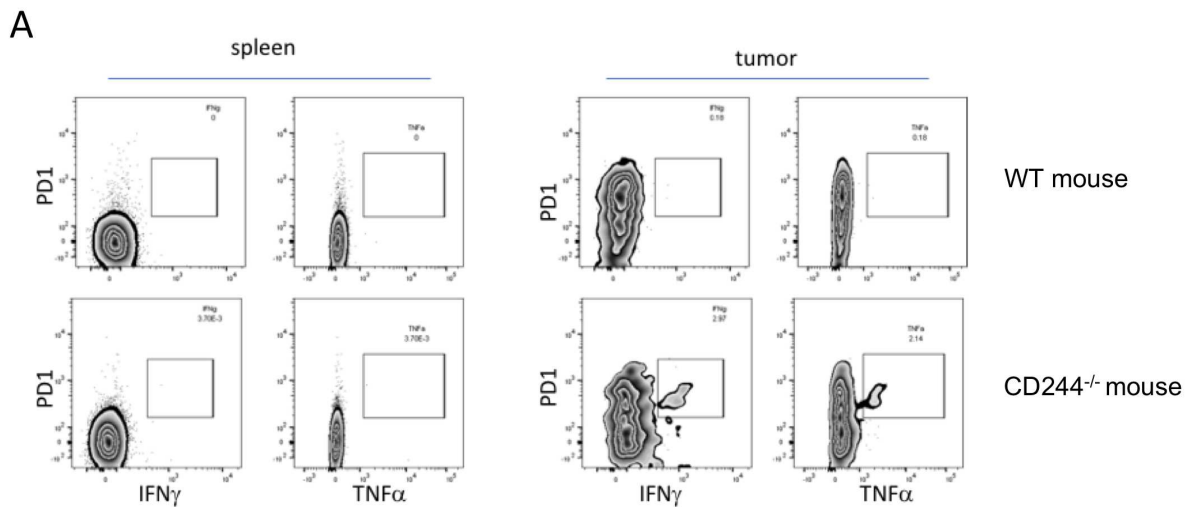

**Supplemental Figure 6. (A)** MEER tumor cells were grown subcutaneously in WT and CD244<sup>-/-</sup> mice. Tumors were harvested on Day 32, TILs incubated for 5 hours at 37°C with or without CD3 stimulation, and analyzed by flow cytometry. Cells were gated as described in Supplemental Figure 3. PD-1 expression increased in CD8<sup>+</sup> TILs compared to splenic CD8<sup>+</sup> T cells. Spontaneous pro-inflammatory cytokine production (TNF $\alpha$  and IFN $\gamma$ ) was increased in CD244<sup>-/-</sup> CD8<sup>+</sup> TILs compared to WT.
