# Supplementary material for: CD244 represents a new therapeutic target in head and neck squamous cell carcinoma
Source: PubMed Central journal article supplement — J Immunother Cancer. 2020 Mar 26;8(1):e000245. doi: 10.1136/jitc-2019-000245 (PMC7174077; doi:10.1136/jitc-2019-000245), 2020-03-26
Supplement: jitc-2019-000245supp007.pdf [file jitc-2019-000245supp007.pdf]

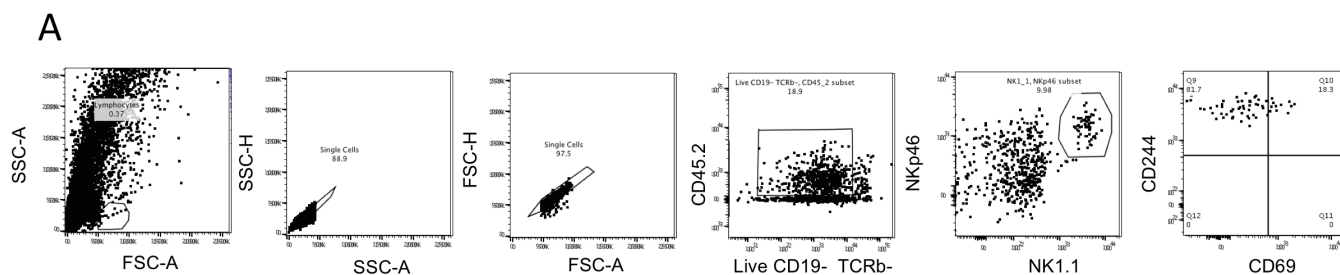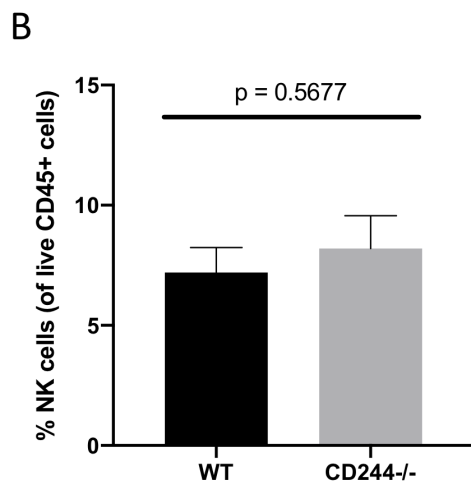

**Supplemental Figure 7. (A)** MEER tumor cells were grown subcutaneously in WT and CD244<sup>-/-</sup> mice. Tumors were harvested on Day 35 and analyzed by flow cytometry. Cells were first gated on lymphocytes, then sequentially on SSC-H vs SSC-A and FSC-H vs FSC-A to define single cells. Live (viability dye negative) CD45<sup>+</sup> hematopoietic cells were gated from the single cells. NK cells were identified by NKp46<sup>+</sup> NK1.1<sup>+</sup>. Consistent with previous studies, CD244 was ubiquitously expressed on NK cells from WT mice. Only a minority of intratumoral NK cells (<20%) expressed activation marker CD69. **(B)** There was no significant difference in the percentage of NK cells within the live hematopoietic (CD45<sup>+</sup>) intratumoral cell population in MEER tumors grown in WT versus CD244<sup>-/-</sup> mice.
